# Supplementary material for: Min waves without MinC can pattern FtsA-anchored FtsZ filaments on model membranes
Source: PubMed Central journal article supplement (PMC9262947; doi:10.1038/s42003-022-03640-1), 2022-07-07
Supplement: 42003_2022_3640_MOESM2_ESM.pdf [file 42003_2022_3640_MOESM2_ESM.pdf]

Supplementary Information for

**Min waves without MinC can pattern FtsA-anchored FtsZ  
filaments on model membranes**

Elisa Godino, Anne Doerr, Christophe Danelon\*

Department of Bionanoscience, Kavli Institute of Nanoscience, Delft University of Technology,  
Van der Maasweg 9, 2629HZ, Delft, The Netherlands.

\*Correspondence: Christophe Danelon

Email: [c.j.a.danelon@tudelft.nl](mailto:c.j.a.danelon@tudelft.nl)

**Supplemental information includes:**

Supplementary Methods  
Figures S1 to S9  
Tables S1 to S2

**Other supplementary materials for this manuscript:**

Movies S1 to S7 are provided as separate files

## Supplementary Methods

### DNA sequence of the *minD-minE* construct

TAATACGACTCACTATAGGGGAATTGTGAGCGGATAACAATTCCCCTCTAGAAATAATTTTGTTTAACTT  
TAAGAAGGAGATATACATATGGCACGCATTATTGTTGTTACTTCGGGCAAAGGGGGTGTGGTAAGACA  
ACCTCCAGCGCGCCATCGCCACTGGTTTGGCCCAGAAGGGAAAGAAAAGTGTGCGTATAGATTTTGA  
TATCGGCCTGCGTAATCTCGACCTGATTATGGGTTGTGAACGCCGGGTCGTTTACGATTTTCGTC AACGT  
CATT CAGGGCGATGCAACGCTAAATCAGGCGTTAATTAAGATAAGCGTACTGAAAATCTCTATATTCTG  
CCGGCATCGCAAACACGCGATAAAGATGCCCTCACCCGTGAAGGGGTGCGCAAAGTTCTTGATGATCT  
GAAAGCGATGGATTTTGAATTTATCGTTTGTGACTCCCCGGCAGGGATTGAAACCGGTGCGTTAATGGC  
ACTCTATTTTGCAGACGAAGCCATTATTACCACCAACCCGGAAGTCTCCTCAGTACGCGACTCTGACCG  
TATTTTAGGCATTCTGGCGTCGAAATCACGCCGCGCAGAAAATGGCGAAGAGCCTATTAAGAGCACCT  
GCTGTTAACGCGCTATAACCCAGGCCGCGTAAGCAGAGGTGACATGCTGAGCATGGAAGATGTGCTG  
GAGATCCTGCGCATCAAACCTCGTCGGCGTGATCCCAGAGGATCAATCAGTATTGCGCGCCTCTAACCA  
GGGTGAACCGGTCACTCTCGACATTAACGCCGATGCGGGTAAAGCCTACGCAGATACCGTAGAACGTC  
TGTTGGGAGAAGAACGTCCTTTCCGCTTCATTGAAGAAGAGAAGAAAGGCTTCCTCAAACGCTTGTTG  
GAGGATAAGGATCCGGCTGCTAACAAAGCCCCGAAAGGAAGCTGAGTTGGCTGCTGCCACCGCTGAGC  
AATAACTAGCATAACCCCTTGGGGCCTCTAAACGGGTCTTGAGGGTTTTTTGATTGGGTATCGGATCC  
CGGGCCCGTACTGCAGAGGCCTGCATGCAAGCTTGGCGTAATCATGGTCATAGCTGTTTCTGTGT  
GTAATACGACTCACTATAGGGGAATTGTGAGCGGATAACAATTCCCCTCTAGAAATAATTTTGTTTAACT  
TTAAGAAGGAGATATACATATGGCGCTGCTGGATTTCTTTCTGAGCCGTAAGAAAAACACCGCGAACAT  
CGCGAAAGAGCGTCTGCAATCATTGTTGCGGAGCGTCGTCGTAGCGATGCGGAACCGCACTACCTG  
CCGCAGCTGCGTAAAGATATCCTGGAAGTGATTTGCAAGTATGTTCAAATTGACCCGGAGATGGTGACC  
GTT CAGCTGGAACAAAAGGACGGTGATATCAGCATTCTGGAGCTGAACGTTACCC TGCCGGAAGCGGA  
GGAAGTGAAGTAAGGATCCGGCTGCTAACAAAGCCCCGAAAGGAAGCTGAGTTGGCTGCTGCCACCGC  
TGAGCAATAACTAGCATAACCCCTTGGGGCCTCTAAACGGGTCTTGAGGGTTTTTTG

### DNA sequence of the *ftsA-minD-minE* construct

TAATACGACTCACTATAGGGGAATTGTGAGCGGATAACAATTCCCCTCTAGAAATAATTTTGTTTAACTT  
TAAGAAGGAGATATACATATGATCAAGGCGACCGACCGTAAGCTGGTTGTGGGCCTGGAGATTGGCAC  
CGCGAAGGTTGCGGGCGCTGGTTGGCGAGGTTCTGCCGGATGGTATGGTTAACATTATCGGCGTTGGTA  
GCTGCCCAGCCGTGGCATGGACAAAGGTGGTGTGAACGACCTGGAAAGCGTGGTTAAGTGCGTGCA  
GCGTGCGATTGACCAGGCGGAGCTGATGGCGGACTGCCAAATCAGCAGCGTTTACCTGGCGCTGAGC  
GGCAAGCACATCAGCTGCCAAAACGAGATTGGTATGGTGCCGATTAGCGAAGAGGAAGTTACCCAGGA  
AGATGTGGAGAACGTGGTTCACACCGCGAAAAGCGTTCGTGTGCGTGATGAACACCGTGTGCTGCACG  
TTATCCCGCAAGAATACGCGATCGATTACCAGGAAGGTATCAAAAACCCGGTTGGTCTGAGCGGTGTT  
CGTATGCAGGCGAAAGTGCACCTGATTACCTGCCACAACGATATGGCGAAGAACATTGTGAAAGCGGT  
TGAACGTTGCGGTCTGAAGGTTGACCAGCTGATCTTCGCGGGTCTGGCGAGCAGCTACAGCGTTCTGA  
CCGAAGATGAGCGTGAAGTGGTGTGCGTTGTGGATATCGGCGGTGGCACGATGGATATCGCGGT  
GTATACCGGTGGCGCGCTGCGTCACACCAAAGTGATTCCGTATGCGGGTAACGTGGTTACCAGCGACA  
TCGCGTACGCGTTTGGCACCCCGCCGAGCGATGCGGAGGCGATCAAAGTGCCTCACGGTTGCGCGCT  
GGGTAGCATTGTGGGTAAAGATGAGAGCGTGGAAGTTCCGAGCGTTGGTGGCCGTCCGCCGCGTAGC

CTGCAACGTCAGACCCTGGCGGAAGTTATCGAGCCGCGTTACACCGAACTGCTGAACCTGGTGAACGA  
AGAGATCCTGCAACTGCAAGAGAAACTGCGTCAGCAAGGTGTTAAGCACACCTGGCGGCGGGCATT  
GTTCTGACCGGCGGTGCGGCGCAGATCGAAGGTCTGGCGGCGTGCGCGCAACGTGTTTTCCACACCC  
AAGTTCGTATCGGTGCGCCGCTGAACATCACCGGTCTGACCGATTACGCGCAAGAGCCGTAATAGC  
ACCGCGTGTGGTCTGCTGCACTATGGCAAAGAGAGCCACCTGAACGGCGAGGCGGAAGTGGAGAAGC  
GTGTGACCGCGAGCGTTGGTAGCTGGATTAAGCGTCTGAATAGCTGGCTGCGTAAGGAGTTCTAAGGA  
TCCGGCTGCTAACAAAGCCCCGAAAGGAAGCTGAGTTGGCTGCTGCCACCGCTGAGCAATAACTAGCAT  
AACCCCTTGGGGCCTCTAACCGGGTCTTGAGGGGTTTTTTGATCGGATCCCGGGCCCGTGCAGTGCAG  
AGGCCTGCATGCAAGCTTGGCGTAATCATGGTCATAGCTGTTTCCTGTGTGCTGCCCGCTTCCAGTGC  
GGAAACCTGTCGTGCCAGCTGCATTAATGAATCGGCCAACGCCAGTCACGACGTTGTAAAACGACGGC  
CAGTGAATTCGAGCTCGGTACCTCGCGAATGCATCTAGATGCGAAATTAATACGACTCACTATAGGGGA  
ATTGTGAGCGGATAACAATCCCCTCTAGAAATAATTTGTTAACTTTAAGAAGGAGATATACATATGG  
CACGCATTATTGTTGTTACTTCGGGCAAAGGGGGTGTGGTAAGACAACCTCCAGCGCGGCCATCGCC  
ACTGGTTTGGCCCAGAAGGGAAAGAAAAGTGTGCTGATAGATTTTGATATCGGCCTGCGTAATCTCGAC  
CTGATTATGGGTTGTGAACGCCGGGTCGTTTACGATTTTCGCAACGTCATTCAGGGCGATGCAACGCTA  
AATCAGGCGTTAATTAAGATAAGCGTACTGAAAATCTCTATATTCTGCCGGCATCGCAAACACGCGAT  
AAAGATGCCCTCACCCGTGAAGGGTGCCTAAAGTTCTTGATGATCTGAAAGCGATGGATTTTGAATTT  
ATCGTTTGTGACTCCCCGGCAGGGATTGAAACCGGTGCGTTAATGGCACTCTATTTTGCAGACGAAGC  
CATTATTACCACCAACCCGGAAGTCTCCTCAGTACGCGACTCTGACCGTATTTTAGGCATTCTGGCGTC  
GAAATCACGCCGCGCAGAAAATGGCGAAGAGCCTATTAAGAGCACCTGCTGTTAACGCGCTATAACC  
CAGGCCGCGTAAGCAGAGGTGACATGCTGAGCATGGAAGATGTGCTGGAGATCCTGCGCATCAAAC  
CGTCGGCGTGATCCCAGAGGATCAATCAGTATTGCGCGCCTCTAACAGGGTGAACCGGTCATTCTCG  
ACATTAACGCCGATGCGGGTAAAGCCTACGCAGATACCGTAGAACGTCTGTTGGGAGAAGAACGTCCT  
TTCCGCTTATTGAAGAAGAGAAGAAAGGCTTCTCAAACGCTTGTTCGGAGGATAAGGATCCGGCTG  
CTAACAAAGCCCGAAAGGAAGCTGAGTTGGCTGCTGCCACCGCTGAGCAATAACTAGCATAACCCCTT  
GGGGCCTCTAACCGGGTCTTGAGGGGTTTTTTGATTGGGTATCGGATCCCGGGCCCGTGCAGTGCAGA  
GGCCTGCATGCAAGCTTGGCGTAATCATGGTCATAGCTGTTTCCTGTGTGTAATACGACTCACTATAGG  
GGAATTGTGAGCGGATAACAATCCCCTCTAGAAATAATTTTGTAACTTTAAGAAGGAGATATACATA  
TGGCGCTGCTGGATTTCTTCTGAGCCGTAAGAAAAACACCGCGAACATCGCGAAAGAGCGTCTGCAA  
ATCATTGTTGCGGAGCGTCGTCGTAGCGATGCGGAACCGCACTACCTGCCGCAGCTGCGTAAAGATAT  
CCTGGAAGTGATTGCAAGTATGTTCAAATTGACCCGGAGATGGTGACCGTTCAGCTGGAACAAAAGG  
ACGGTGATATCAGCATTCTGGAGCTGAACGTTACCTGCCGGAAGCGGAGGAACTGAAGTAAGGATCC  
GGCTGCTAACAAAGCCCGAAAGGAAGCTGAGTTGGCTGCTGCCACCGCTGAGCAATAACTAGCATAAC  
CCCTTGGGGCCTCTAACCGGGTCTTGAGGGGTTTTTTG

**DNA sequence QconCAT**

TAATACGACTCACTATAGGGAGACCACAACGGTTTTCCCTCTAGAAATAATTTTGTAACTTTAAGAAGG  
AGATATACATATGCGGGTTCTCATCATCATCATCATGGTATGGCTAGCATGACTGGTGGACAGCA  
AATGGGTCGGGACCTGTACGACGACGACGATAAGAGCCTGTTTCCGAAAAGCAGCGTGGCGGTTAGC  
TGGATTGGTAAAGCGGCGGCGGGTGTGAGCGATGATGCGCGTATGGACCTGGCGAGCCAGTTTT  
ACGAGAAGGCGGTGCTGTTGATCTGGAACCGGGTGTATTGCGCGTGCGACCAACCCGCTGGTGCG

TGCGGCGAGCCTGCTGGTTGACAACTGGGCGAGAGCAGCAGCGGTAGCTATGTTCCGCGTAACATC  
ATGGGTATTGAGGTGCCGGAACCCTGGTTCACAAGACCATCTTCTTTAAACAGGCGAGCGAACAAAA  
CTGGGCGAACTACAGCGCGGAGCAGAACCGTTTCGAAGGCGATACCCTGGTGAACCGTACCTACATCA  
TCAGCATCCTGTTCAAGAACCAGATTGCGACCCTGGCGCAAAGCTATCGTGGTCTGGGTGCGGGTGCG  
AACCCGGAAGTGGGTGCTGAATATCAAGACATTATCCGTATGCTGCAGCAAACCATCGAGCAGGCGCT  
GCTGGAACAAGGTGCTCTGATTGTGCTGCTGCTGCTGGGCTTCGGCGAGCGTGCGTACGCGGATAACC  
GTTGAACGTGGCAGCAGCTTTACCCTGAGCGTGGTTCACCTGCACGAGGCGGAACCGAAGCTGCAGT  
GGCAAGAGAGCGACGGTACCATCAAATACCGTCCGACCGACGATTCGATGCGCGTTATACCGAACTG  
CTGAACCTGGTGAACGAGGAAATTCTGCAGCTGCAAGAGAAGGACATCCTGGAAGTTATTTGCAAAGAT  
GCGCTGAACCAGGCGGCGGACGATCTGAACCAACGTGTGGTTAACGACAACGCGCCGAGACCGCGA  
AAGATGCGCTGAGCCTGGCGCGTGGCGGTGTGAACGACCTGGAGAGCGTGGTTAAGATTATCGTGGT  
TACCAGCGTAAAGCGCTGGCGGGTGCAGCGGTGACCGTGATACCATCGGCGACATTATCATTCTG  
CCGCGTCTGAGCGATTACGGTGTCAACTGCGTGCGCCGGTGGTTGTTCCGGCGGGTGTGGACGTGA  
AAGCGATTAGCCTGAGCGTGCCTAACTAGCATAACCCCTTGGGGCCTCTAAACGGGTCTTGAGGGT  
TTTTTG

**DNA sequence of the *ftsA*\* construct**

TAATACGACTCACTATAGGGGAATTGTGAGCGGATAACAATTCCCCTCTAGAAATAATTTTGTTTAACTT  
TAAGAAGGAGATACATATGATCAAGGCGACCGACCGTAAGCTGGTTGTGGGCCTGGAGATTGGCAC  
CGCGAAGGTTGCGGCGCTGGTTGGCGAGTTCTGCCGGATGGTATGGTTAACATTATCGGCGTTGGTA  
GCTGCCCCGAGCCGTGGCATGGACAAAGGTGGTGTGAACGACCTGGAAAGCGTGGTTAAGTGCCTGCA  
GCGTGCGATTGACCAGGCGGAGCTGATGGCGGACTGCCAAATCAGCAGCGTTTACCTGGCGCTGAGC  
GGCAAGCACATCAGCTGCCAAAACGAGATTGGTATGGTGCCGATTAGCGAAGAGGAAGTTACCCAGGA  
AGATGTGGAGAACGTGGTTCACACCGCGAAAAGCGTTCGTGTGCGTGATGAACACCGTGTGCTGCACG  
TTATCCC GCAAGAATACGCGATCGATTACCAGGAAGGTATCAAAAACCCGGTTGGTCTGAGCGGTGTT  
CGTATGCAGGCGAAAGTGCACCTGATTACCTGCCACAACGATATGGCGAAGAACATTGTGAAAGCGGT  
TGAACGTTGCGGTCTGAAGGTTGACCAGCTGATCTTCGCGGGTCTGGCGAGCAGCTACAGCGTTCTGA  
CCGAAGATGAGCGTGAACCTGGGTGTTTGCCTGTGGATATCGGCGGTGGCACGATGGATATCGCGGT  
GTATACCGGTGGCGCGCTGCGTCACACCAAAGTGATTCCGTATGCGGGTAACGTGGTTACCAGCGACA  
TCGCGTACGCGTTTGGCACCCCGCCGAGCGATGCGGAGGCGATCAAAGTGCCTCACGGTTGCGCGCT  
GGGTAGCATTGTGGGTAAAGATGAGAGCGTGGAAAGTTCCGAGCGTTGGTGGCCGTCGCCCGGTAGC  
CTGCAACGTCAGACCCTGGCGGAAGTTATCGAGCCGCGTTACACCGAACTGCTGAACCTGGTGAACGA  
AGAGATCCTGCAACTGCAAGAGAAACTGCGTCAGCAAGGTGTTAAGCACCACTGGCGGCGGGCATT  
GTTCTGACCGGCGGTGCGGCGCAGATCGAAGGTCTGGCGGCGTGCGCGCAACGTGTTTTCCACACCC  
AAGTTCGTATCGGTGCGCCGCTGAACATCACCGGTCTGACCGATTACGCGCAAGAGCCGTA CTATAGC  
ACCGCGGTTGGTCTGCTGCACTATGGCAAAGAGAGCCACCTGAACGCGGAGGCGGAAGTGGAGAAGC  
GTGTGACCGCGAGCGTTGGTAGCTGGATTAAGCGTCTGAATAGCTGGCTGCGTAAGGAGTTCTAAGGA  
TCCGGCTGCTAACAAAGCCCCGAAAGGAAGCTGAGTTGGCTGCTGCCACCGCTGAGCAATAACTAGCAT  
AACCCCTTGGGGCCTCTAAACGGGTCTTGAGGGTTTTTTG

**DNA sequence of the *zipA* construct**

TAATACGACTCACTATAGGGGAATTGTGAGCGGATAACAATTCCCCTCTAGAAATAATTTTGTTTAACTT  
TAAGAAGGAGATATACATATGCATCACCATCATCACCATCACGGTTTTTGGACCAGCCGAAAGAACGT  
AGCAGCATGTTCCGTGATCGTCCGCTGAAGCGTATGAAGAGCAAACGTGACGATGACAGCTACGATGA  
GGACGTGGAAGATGACGAGGGTGTGGCGAGGTGCGCGTTCATCGTGTGAACCATGCGCCGGCGAAC  
GCGCAGGAGCACGAAGCGGCGCGTCCGAGCCCGCAGCACCAATATCAGCCGCCGTATGCGAGCGCG  
CAACCGCGTCAGCCGGTGCAGCAACCGCCGGAAGCGCAAGTTCGCGCCGAGCATGCGCCGCACCCG  
GCGCAACCGGTTGAGCAACCGGCGTATCAACCGCAACCGGAGCAGCCGCTGCAACAACCGGTGAGCC  
CGCAAGTTGCGCCGGCGCCGAGCCGGTGCACAGCGCGCCGCAACCGGCGCAGCAAGCGTTCCAAC  
CGGCGGAACCGGTTGCGGCGCCGAGCCGGAACCGGTTGCGGAGCCGGCGCCGGTTATGGACAAGC  
CGAAACGTAAAGAGGCGGTGATCATTATGAACGTTGCGGCGCACACGGTAGCGAACTGAACGGCGA  
GCTGCTGCTGAACAGCATCCAGCAAGCGGGTTTTCATTTTTGGCGATATGAACATCTACCACCGTCATCT  
GAGCCCGGATGGTAGCGGTCCGGCGCTGTTTAGCCTGGCGAACATGGTGAAACCGGGCACCTTCGAT  
CCGAAAATGAAGGACTTTACCACCCCGGTGTGACCATTTTCATGCAAGTTCGAGCTATGGCGATGA  
GCTGCAAACTTTAAACTGATGCTGCAAAGCGCGCAGCACATCGCGGACGAGGTTGGTGGCGTGGTTC  
TGGATGACCAGCGTCGTATGATGACCCCGAAAAGCTGCGTGAATACCAGGACATTATCCGTGAAGTG  
AAAGATGCGAACGCGTAAGGATCCGGCTGCTAACAAGCCCGAAAGGAAGCTGAGTTGGCTGCTGCC  
ACCGCTGAGCAATAACTAGCATAACCCCTTGGGGCCTCTAACGGGTCTTGAGGGGTTTTTTG

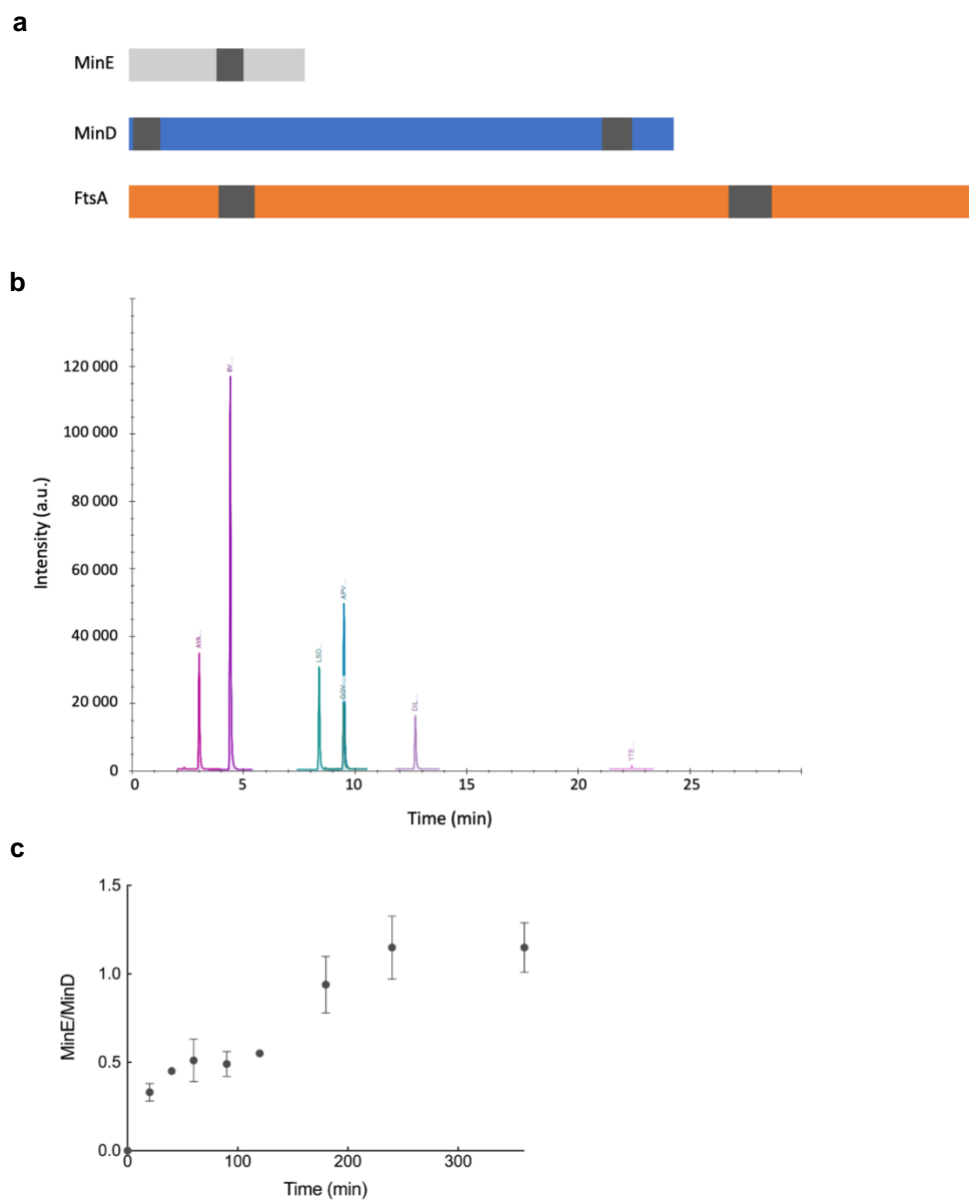

**Figure S1.** Quantitative LC-MS analysis of cell-free synthesized FtsA, MinD and MinE in bulk reactions. **a** Cartoon depicting the position of the analyzed specific proteolytic peptides (dark grey domains) along the primary sequence of FtsA, MinD and MinE, from N-term (left) to C-term (right). **b** LC-MS chromatogram of the investigated peptides. From left to right: AYADTVER (MinD); IIVVTSGK (MinD); LSDYGVQLR (ribosomal protein S4); GGVNDLESVVK (FtsA); APVVPAGVDVK (ribosomal protein L6); DILEVICK (MinE); YTELLNLVNEEILQLQEK (FtsA). The two peptides for ribosomal proteins were used for quality control. **c** Concentration ratio of expressed MinE and MinD proteins as a function of time. Symbols correspond to mean values and the error bars represent standard deviations.

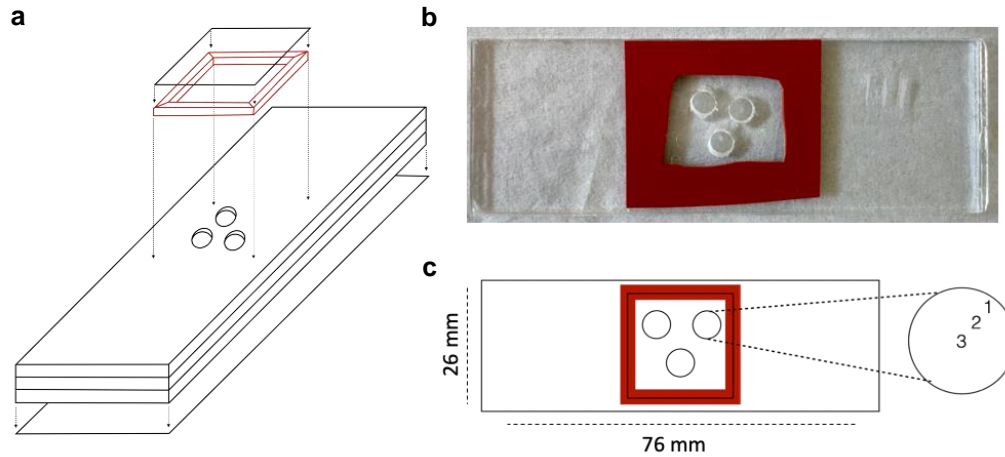

**Figure S2.** Home-made imaging glass chamber. **a** Schematic of the chamber assembly. Each well has a diameter of 2.5 mm. Dashed arrows indicate the direction of assembly of each part of the chamber. Three glued and drilled glass slides were attached to a 150- $\mu\text{m}$  thick glass coverslip using NOA 61 glue to form the bottom of the chamber. A 20 $\times$ 20-mm glass coverslip was placed on top of a double-sided adhesive silicone sheet (in red) to close the chamber. **b** Picture of an imaging chamber taken from the top. **c** Schematic of the sealed chamber viewed from the top. The digits (1, 2, 3) indicate the position of the fields of view as displayed in Figure 2b and 3b: (3) indicates the center of the chamber, (1) the edges of the chamber and (2) the intermediate areas.

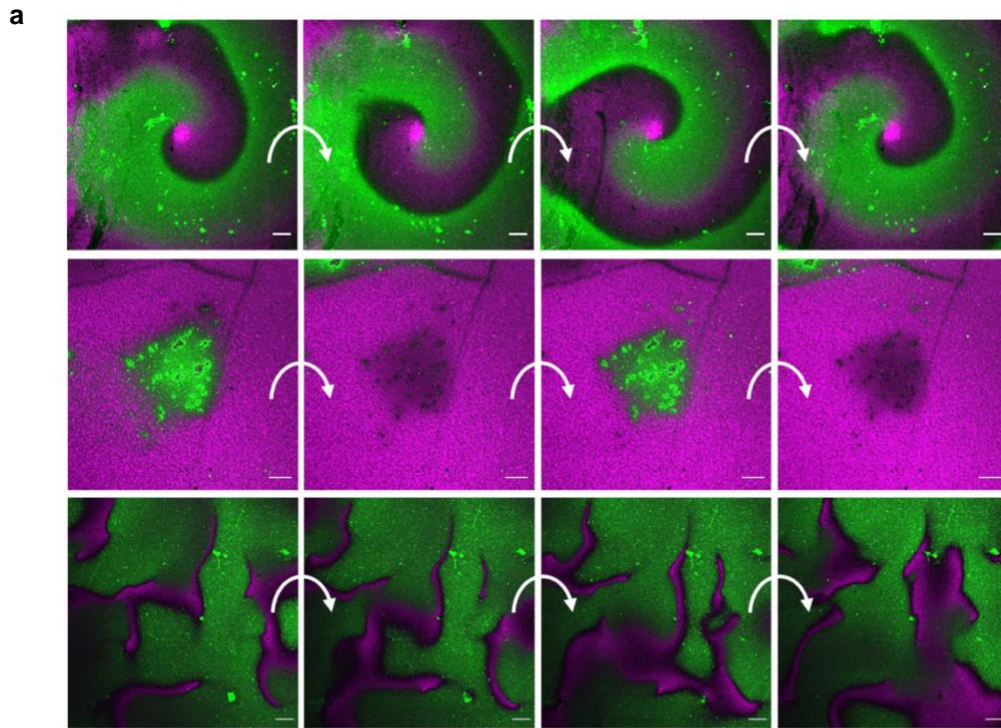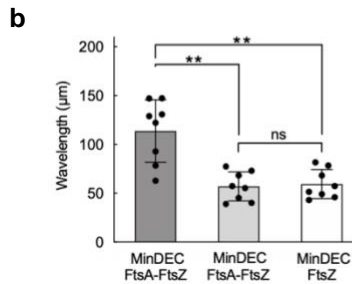

**Figure S3.** MinDEC patterns and FtsA-FtsZ structures in supported membrane assays. **a** Composite fluorescence microscopy images of FtsA-FtsZ and MinDEC dynamic patterns on an SLB. Different patterns including spirals (top), standing (middle) and random (bottom) are shown. Arrows indicate time lapse between images. Experimental conditions and color coding are the same as in main text Figure 2b and 2c. Scale bars are 10  $\mu\text{m}$ . **b** Calculated wavelengths for MinDEC waves in areas where FtsA-FtsZ co-existed (dark grey), were excluded (light grey), and without expressed FtsA (white). Data are from three biological repeats and two to three fields of view have been analyzed per sample. Bar height represents the mean value and the error bar corresponds to the standard deviation. Symbols are values for individual fields of view aggregated from three biological replicates. Values obtained for different conditions were statistically compared by performing a two-tailed Welch's  $t$ -test. Asterisks indicate  $P$  value  $<0.01$ , while 'ns' denotes a non-significant difference with  $P$  value  $>0.05$ .



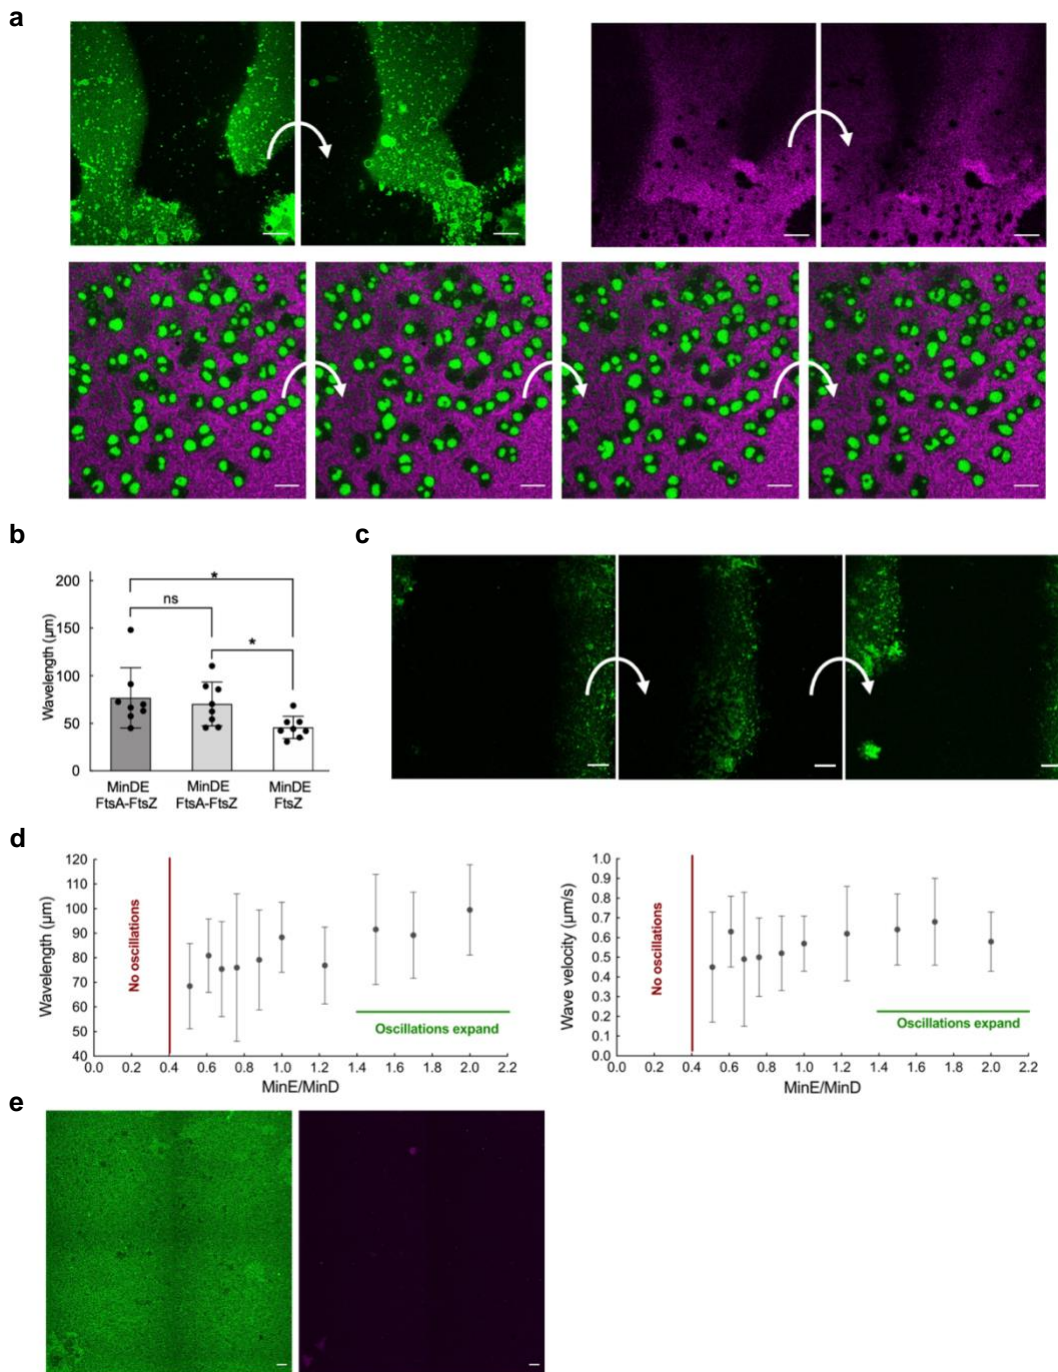

**Figure S4.** Self-organized MinDE proteins, without MinC, can effectively rearrange FtsA-anchored FtsZ filaments on supported membranes. **a** Fluorescence microscopy images showing that MinDE dynamic patterns rearrange the FtsA-FtsZ cytoskeletal structures on an SLB. Examples of planar (top, split channels) and standing (bottom, merged channels) waves are shown. Arrows indicate time lapse between images. Experimental conditions and color coding are the same as in main text Figure 3, with eGFP-MinD in green and FtsZ-A647 in magenta. Scale bars are 10  $\mu\text{m}$ . **b** Calculated wavelengths for MinDE waves in areas where FtsA-FtsZ co-existed (dark grey), were excluded

(light grey), and without expressed FtsA (white). Data are from three biological repeats and two to three fields of view have been analyzed per sample. Bar height represents the mean value and the error bar corresponds to the standard deviation. Symbols are values for individual fields of view aggregated from three biological replicates. Values obtained for different conditions were statistically compared by performing a two-tailed Welch's *t*-test. Asterisks indicate *P* value <0.05, while 'ns' denotes a non-significant difference. **c** Fluorescence microscopy images of FtsA (0.4  $\mu$ M FtsA-A488, green signal) dynamic patterns driven by MinDE on an SLB. Sharp propagating waves of FtsA are visible. Arrows indicate time lapse between images. FtsA-A488 (green), scale bars are 10  $\mu$ m. **d** Wavelength (left) and velocity (right) of MinDE oscillations for different MinE-to-MinD protein ratios. At MinE/D ratios <0.44, no oscillations were observed. At MinE/D ratios >1.4, the oscillations that were mostly confined to the edges of the chamber (see Figure 3b) expanded over larger membrane areas. **e** Fluorescence microscopy images showing that MinD and FtsZ do not directly interact on the SLB. Here, only MinD was expressed (no FtsA and no MinE). Color coding: eGFP-MinD (green), FtsZ-A647 (magenta). Scale bars are 10  $\mu$ m.

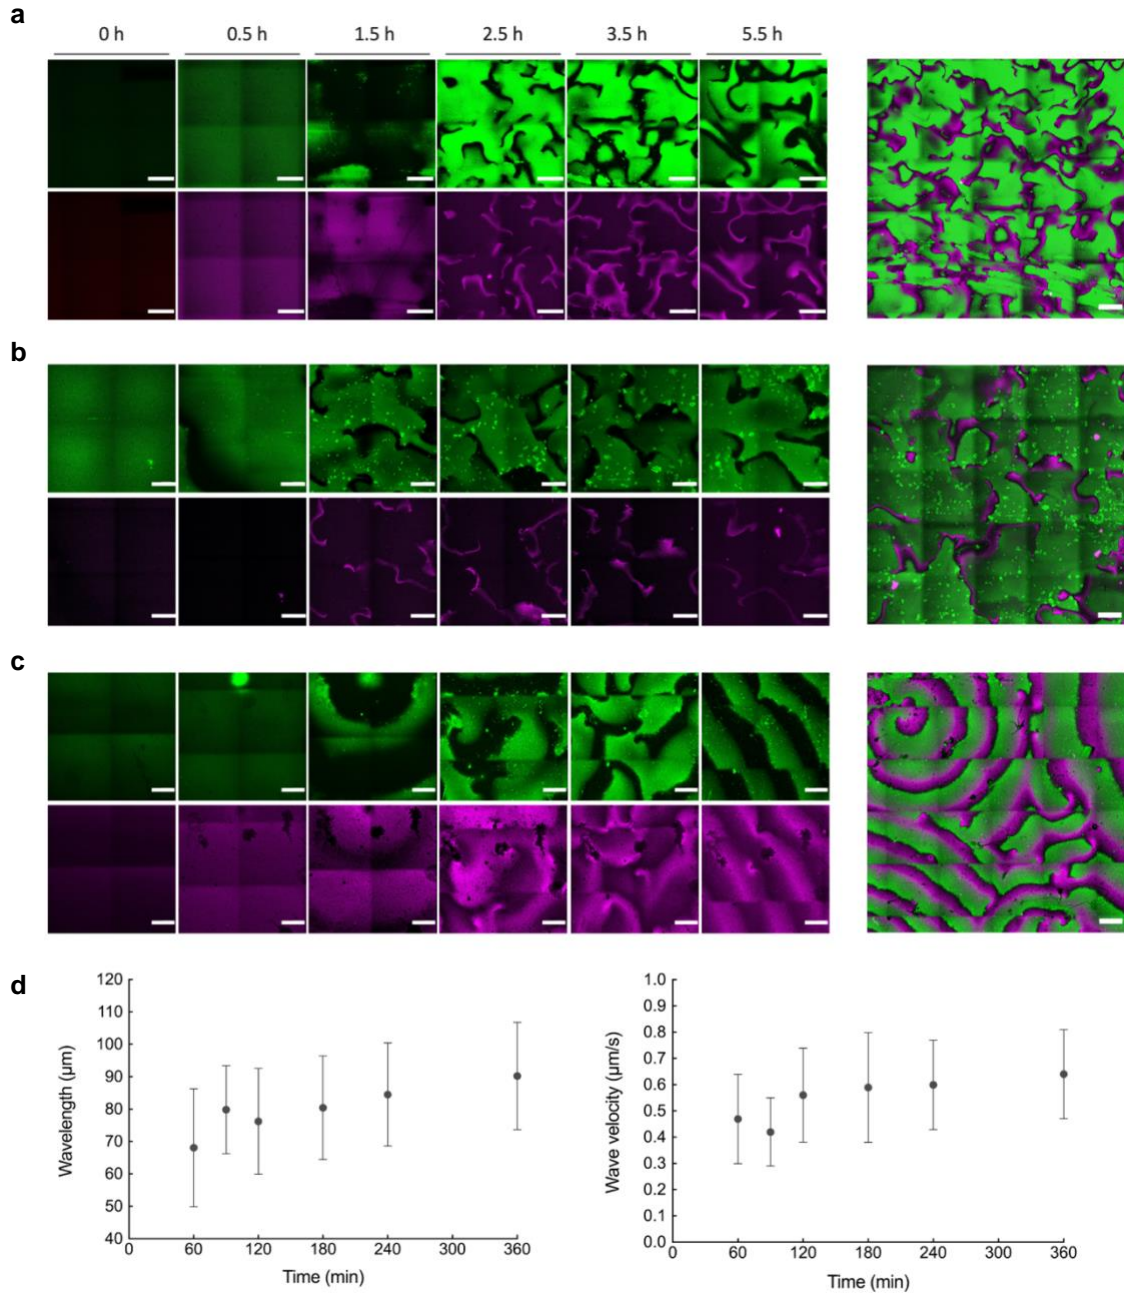

**Figure S5.** Dynamic patterning of MinDE(C) and FtsA-FtsZ during in situ co-expression of FtsA, MinD and MinE. Samples were monitored up to 5.5 hours to study pattern creation and temporal evolution. **a** Two-by-two tile scan microscope images showing medium-scale organization of FtsA-FtsZ and MinDE(C) dynamic patterns at different time points. A mosaic image of 5×5 fields of view acquired after 3.5 hours of expression reveals large-scale, uniformly distributed waves of FtsA-FtsZ and MinDE(C). Signals from eGFP-MinC and FtsZ-A647 are in green and magenta, respectively. The two channels were overlaid to compose the large mosaic image. Scale bars are 20 μm and 50 μm for the 2×2 and 5×5 tile scans, respectively. **b** Same as in **a** except that eGFP-MinC was replaced by a trace amount of purified eGFP-MinD (green). **c** Same as in **b** but in this sample the protein network self-organized into spirals and planar waves.

Dynamic FtsA-FtsZ patterns anti-correlating with the traveling MinDE(C) waves formed uniformly across the chamber. The coexistence of the two subsystems over the entire membrane surface contrasts with the spatial segregation of Min waves and FtsA-anchored FtsZ filaments when pre-expressed proteins were added to the imaging chamber (main text Figure 2b and Figure 3b). This different behavior may be attributed to protein-specific expression kinetics, which influences the coupling of the two subsystems at large length scales. For instance, MinE production being slow (main text Figure 1c) enables MinD and FtsA to bind homogeneously all over the available membrane within the first hour until MinE concentration rises, triggering wave formation. Furthermore, in situ protein biogenesis may occur in close proximity to the lipid bilayer due to the intrinsic ability of ribosomes to bind to membranes, which potentially results in a different local concentration of FtsA and MinD comparing with pre-expressed proteins. In the presence of eGFP-MinC, rings of FtsA-FtsZ cytoskeletal structures formed after 1 hour of gene expression, concomitant to the emergence of MinDEC patterns that began in sporadic areas as standing waves (**a**). In the course of protein production, MinDEC self-organized into sharper traveling waves that colonized the whole chamber, causing stronger patterning of membrane-recruited FtsZ (**a**). In the assays conducted without MinC, eGFP-MinD was recruited to the membrane at the start of the reaction (**b** and **c**). After ~30 min, extensive dynamic patterns of MinDE appeared, followed by FtsZ surface waves that became more pronounced as more FtsA was synthesized. After 1 to 1.5 hours of gene expression, the anticorrelated concentration gradients of membrane-bound FtsA-FtsZ and MinDE became well defined. Here too, MinDE self-organized into crisper traveling waves as protein synthesis was progressing. Together, these results demonstrate that in situ cell-free gene expression can be exploited for timing protein-protein and protein-membrane interactions, which modulates the large-scale organization of the coupled Min-FtsA-FtsZ system. **d** Wavelength (left) and velocity (right) of Min waves during in situ co-expression of FtsA, MinD and MinE. Oscillation properties do not notably change over time.

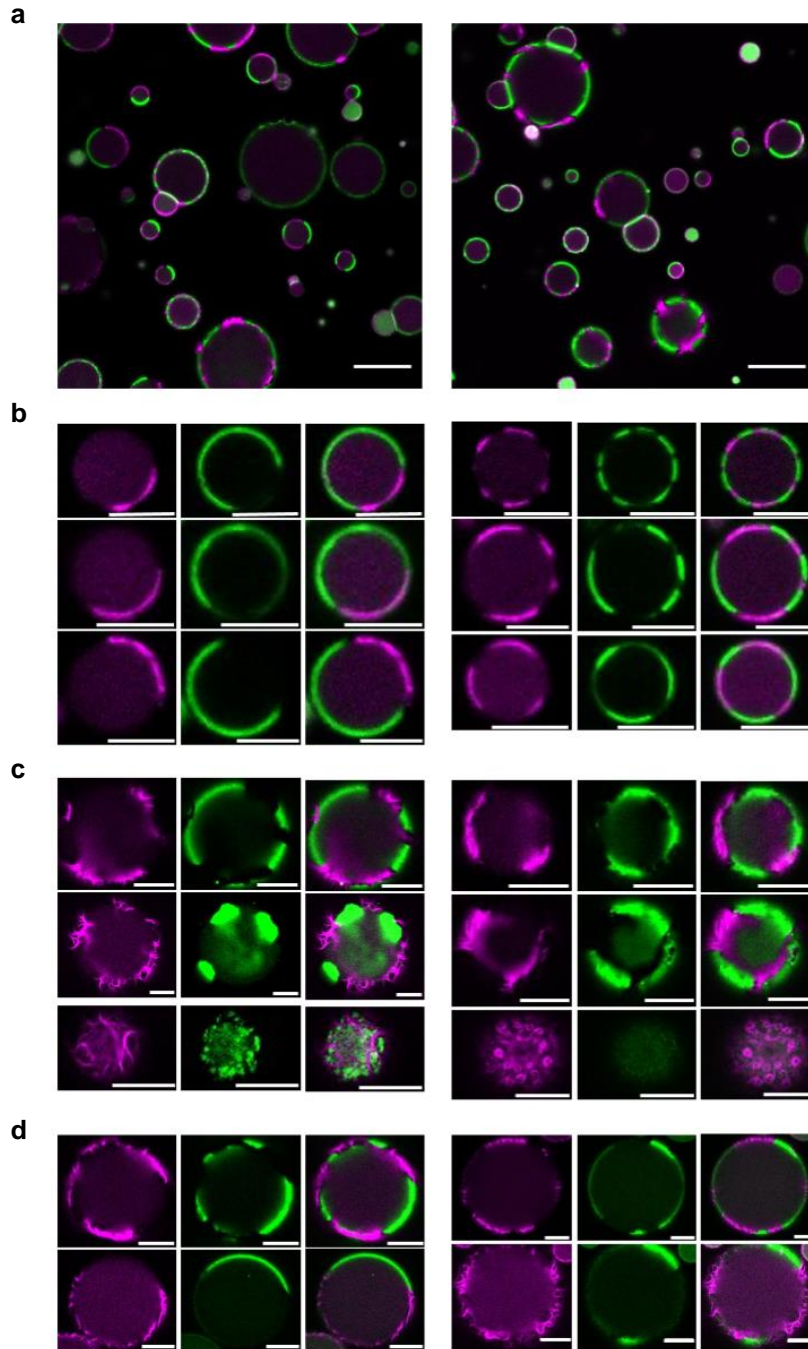

**Figure S6.** Reconstitution of MinDEC and FtsA-FtsZ subsystems in water-in-oil droplets. Composite fluorescence microscopy images of droplet populations and a library of single droplet images with reconstituted MinDEC patterns and FtsA-FtsZ subsystems are shown. **a** Composite image of droplet population. Experimental conditions were as described in main text Figure 4b. **b** Fluorescence images of droplets exhibiting antiphase dynamic patterns of MinDEC and FtsA-FtsZ. Experimental conditions were as described in main text Figure 4b. **c** Same as in **a**, but images were acquired closer to the dome of the droplets. Multiple interfacial FtsZ polarization sites rearranged by the Min dynamics are visible. Experimental conditions were as described in main text Figure 4b. **d** Same as in **b-c**, except that bigger droplets (diameter  $>20\ \mu\text{m}$ ) were imaged. Here, FtsZ cytoskeletal structures are clearly resolved. **a-d** Experimental conditions were as described in main text Figure 4b. Color coding: eGFP-MinC (green), FtsZ-A647 (magenta). Scale bars are  $10\ \mu\text{m}$ .

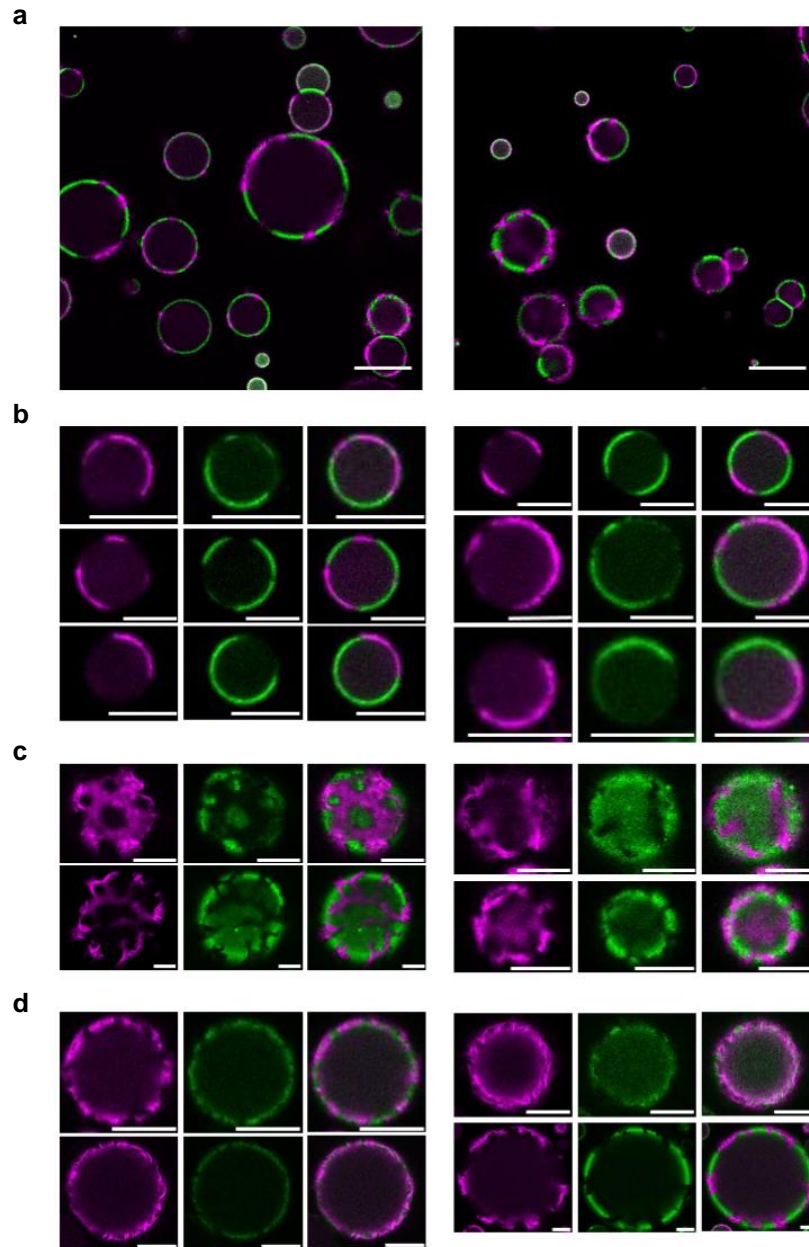

**Figure S7.** Reconstitution of MinDE and FtsA-FtsZ subsystems in water-in-oil droplets. Composite fluorescence microscopy images of droplet populations and a library of single droplet images with reconstituted MinDE patterns and FtsA-FtsZ subsystems are shown. **a** Composite image of droplet population. Experimental conditions were as described in main text Figure 4c. **b** Fluorescence images of droplets exhibiting antiphase dynamic patterns of MinDE and FtsA-FtsZ. Experimental conditions were as described in main text Figure 4c. **c** Same as in **a**, but images were acquired closer to the dome of the droplets. Multiple interfacial FtsZ polarization sites rearranged by the Min dynamics are visible. Experimental conditions were as described in main text Figure 4c. **d** Same as in **b-c**, except that bigger droplets (diameter  $>20\ \mu\text{m}$ ) were imaged. Here, FtsZ cytoskeletal structures are clearly resolved. Experimental conditions were as described in main text Figure 4c. **a-d** Color coding: eGFP-MinD (green), FtsZ-A647 (magenta). Scale bars are  $10\ \mu\text{m}$ .

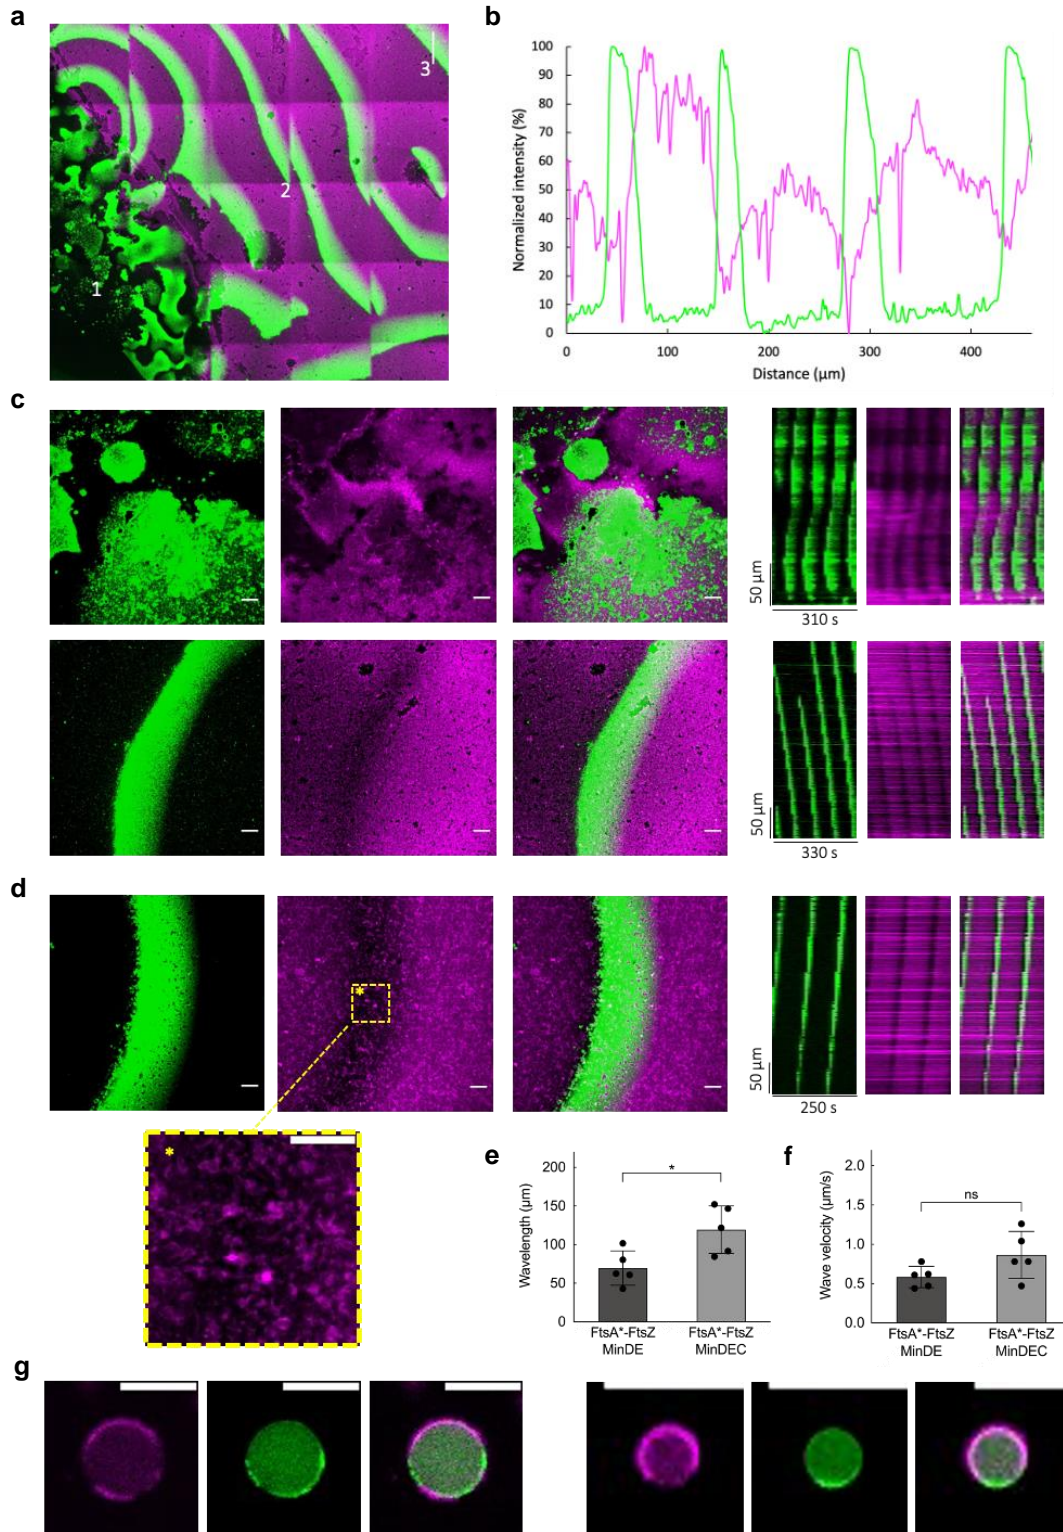

**Figure S8. MinDE(C) proteins regulate FtsA\*-FtsZ patterns on supported membranes.** **a** Mosaic of 5x5 tile scan microscope images showing large-scale organization of FtsA\*-FtsZ and MinDE dynamic patterns. MinDE oscillating gradients dominate at the edges of the chamber (1), while FtsA\*-anchored FtsZ filaments are confined at the center of the chamber (3). Between these

two areas (2), dynamic patterns of the two subsystems can be seen. Interestingly, the area where the two subsystems co-exist is extended towards the center of the chamber (3) when FtsA is substituted with FtsA\*. Signals from eGFP-MinD and FtsZ-A647 are in green and magenta, respectively. Composite images of overlaid channels are shown. Scale bar is 50  $\mu\text{m}$ . **b** Intensity profiles of MinD and FtsZ are shown. Color coding is the same as in the microscopy image. **c** Fluorescence microscopy images of FtsA\*-FtsZ and MinDE dynamic patterns acquired in the intermediate SLB area. Different oscillation patterns were observed: sharp propagating waves of FtsA\*-FtsZ and MinDE (top), and low-amplitude oscillations of FtsZ anticorrelating with MinDE patterns (bottom). Signals from eGFP-MinD and FtsZ-A647 are in green and magenta, respectively. Scale bars are 10  $\mu\text{m}$ . For both fields of view, the time evolution of the oscillations was analyzed, and kymographs were constructed (as displayed on the side). Color coding is the same as in the microscopy images. **d** Fluorescence microscopy images of FtsA\*-FtsZ and MinDEC dynamic patterns. Even in the presence of MinC, the displacement of FtsA\*-anchored FtsZ from the membrane was not complete. A zoom-in image of the framed area in the FtsZ channel is also displayed, revealing that some curved FtsZ filaments remain tethered as the Min wave propagates. Signals from eGFP-MinC and FtsZ-A647 are in green and magenta, respectively. Scale bars are 10  $\mu\text{m}$ . The corresponding kymographs are displayed. Color coding is the same as in the microscopy images. **e-f** Calculated wavelength (**e**) and velocity (**f**) of MinDE and MinDEC waves, both in the presence of FtsA\*-FtsZ. Data are from two biological replicates and two to three fields of view were analyzed per sample. Bar height represents the mean value and the standard deviation is appended. Symbols are values for individual fields of view aggregated from the biological replicates. Values obtained for different conditions were statistically compared by performing a two-tailed Welch's *t*-test. Asterisk indicates *P* value <0.05, while 'ns' denotes a non-significant difference. **g** Fluorescence images of droplets exhibiting antiphase dynamic patterns of MinDE and FtsA\*-FtsZ. Color coding: eGFP-MinD (green), FtsZ-A647 (magenta). Scale bars are 10  $\mu\text{m}$ .



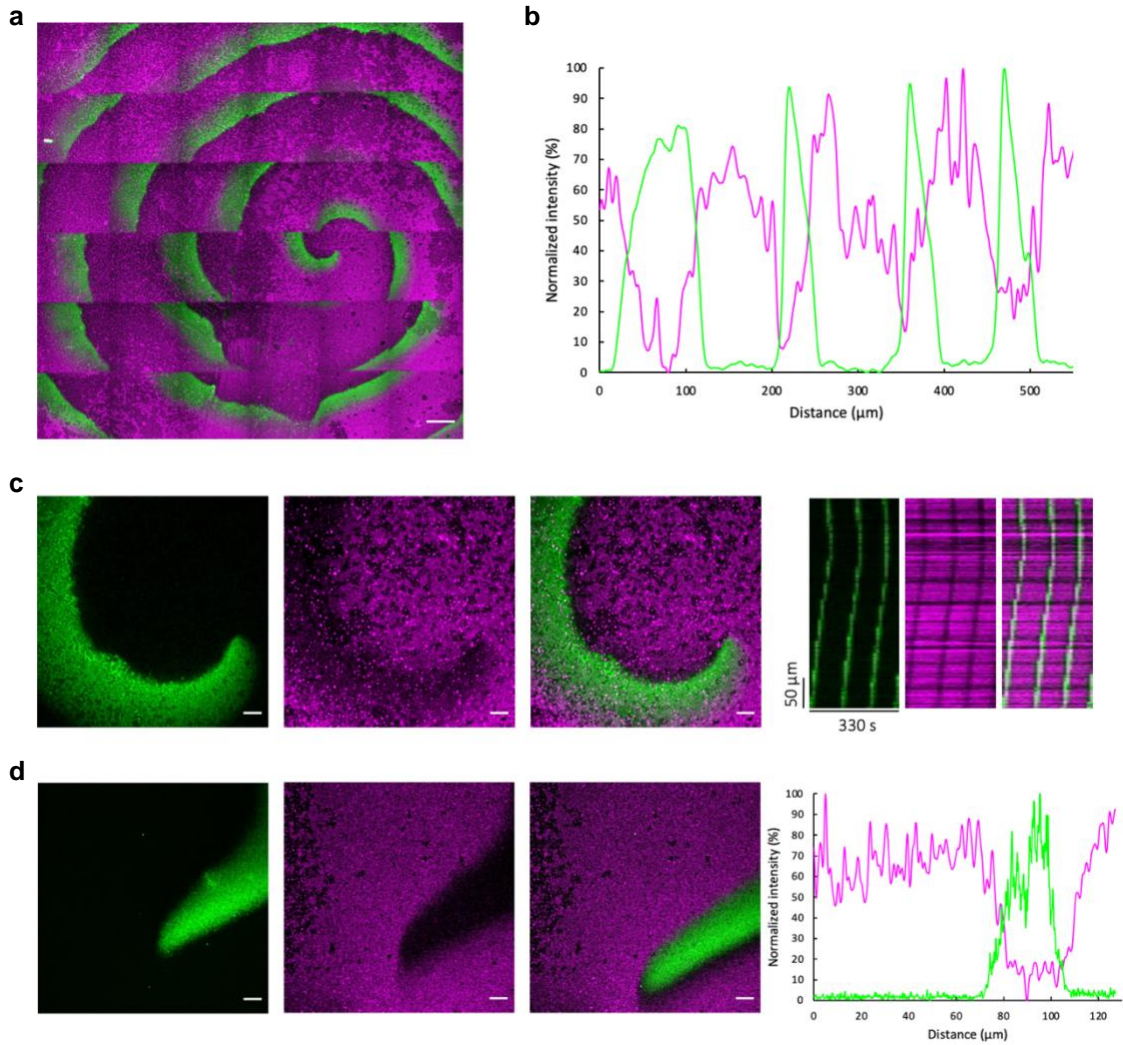

**Figure S9.** MinDE(C) proteins dynamically regulate ZipA-FtsZ patterns on supported membranes. **a** Mosaic of 6x6 tile scan microscope images showing large-scale organization of ZipA-FtsZ and MinDE dynamic patterns. MinDE oscillations are seen all over the chamber, co-existing and anti-correlating with ZipA-anchored FtsZ. Signals from eGFP-MinD and FtsZ-A647 are in green and magenta, respectively. A composite image of the overlaid channels is shown. Scale bar is 50  $\mu\text{m}$ . **b** Intensity profiles of MinD and FtsZ signals. Color coding is the same as in **a**. **c** Fluorescence microscopy images of ZipA-anchored FtsZ and MinDE dynamic patterns. Signals from eGFP-MinD and FtsZ-A647 are in green and magenta, respectively. Scale bars are 10  $\mu\text{m}$ . The corresponding kymographs are displayed on the right. **d** Fluorescence microscopy images of ZipA-FtsZ and MinDEC dynamic patterns. MinC stimulates redistribution of ZipA-anchored FtsZ filaments. Signals from eGFP-MinC and FtsZ-A647 are in green and magenta, respectively. Scale bars are 10  $\mu\text{m}$ . The corresponding intensity profiles are shown on the right.

**Table S1.** List of primers used in this study

| <b>Name</b> | <b>Sequence (5' to 3')</b>                      |
|-------------|-------------------------------------------------|
| 173 ChD     | CACACAGGAAACAGCTATGAC                           |
| 174 ChD     | GAGTCAGTGAGCGAGGAAG                             |
| 365 ChD     | CAGTCACGACGTTGTAAAACGAC                         |
| 420 ChD     | GGAGAGGCGGTTTGCAT                               |
| 504 ChD     | CTGCCCGCTTTCCAGTCGGGAAA                         |
| 1139 ChD    | CATGGTCATAGCTGTTTCCTGTGTGTAATACGACTCACTATAGG    |
| 1140 ChD    | GGTTTCCCGACTGGAAAGCGGGCAGCAAAAACCCCTCAAGACCCG   |
| 1145 ChD    | CCGTCGTTTTACAACGTCGTGACTGGCGTTGGCCGATTCATTAATGC |
| 1187 ChD    | GGCGATTAAGTTGGGTAACG                            |

**Table S2.** Transitions of the MS/MS measurements for the proteolytic peptides of the indicated proteins. Accelerator voltage was kept constant at 4 eV.

| Protein | Compound name      | Precursor ion (m/z) | Product ion (m/z) | Collision energy (eV) | Ion name |
|---------|--------------------|---------------------|-------------------|-----------------------|----------|
| MinD    | AYADTVR            | 462.725             | 690.342           | 15.3                  | y6       |
| MinD    | AYADTVR            | 462.725             | 619.305           | 15.3                  | y5       |
| MinD    | AYADTVR            | 462.725             | 304.162           | 15.3                  | y2       |
| MinD    | AYADTVR            | 462.725             | 235.108           | 15.3                  | b2       |
| MinD    | AYADTVR            | 462.725             | 306.145           | 15.3                  | b3       |
| MinD    | AYADTVR            | 462.725             | 621.288           | 15.3                  | b6       |
| QconCAT | AYADTVR            | 468.208             | 699.315           | 15.3                  | y6       |
| QconCAT | AYADTVR            | 468.208             | 627.281           | 15.3                  | y5       |
| QconCAT | AYADTVR            | 468.208             | 309.147           | 15.3                  | y2       |
| QconCAT | AYADTVR            | 468.208             | 237.102           | 15.3                  | b2       |
| QconCAT | AYADTVR            | 468.208             | 309.136           | 15.3                  | b3       |
| QconCAT | AYADTVR            | 468.208             | 627.270           | 15.3                  | b6       |
| FtsA    | YTELLNLVNEEILQLQEK | 1095.089            | 1243.653          | 34.9                  | y10      |
| FtsA    | YTELLNLVNEEILQLQEK | 1095.089            | 871.525           | 34.9                  | y7       |
| FtsA    | YTELLNLVNEEILQLQEK | 1095.089            | 758.441           | 34.9                  | y6       |
| FtsA    | YTELLNLVNEEILQLQEK | 1095.089            | 645.357           | 34.9                  | y5       |
| FtsA    | YTELLNLVNEEILQLQEK | 1095.089            | 517.298           | 34.9                  | y4       |
| FtsA    | YTELLNLVNEEILQLQEK | 1095.089            | 847.456           | 34.9                  | b7       |
| QconCAT | YTELLNLVNEEILQLQEK | 1106.555            | 1257.611          | 34.9                  | y10      |
| QconCAT | YTELLNLVNEEILQLQEK | 1106.555            | 881.495           | 34.9                  | y7       |
| QconCAT | YTELLNLVNEEILQLQEK | 1106.555            | 767.414           | 34.9                  | y6       |
| QconCAT | YTELLNLVNEEILQLQEK | 1106.555            | 653.333           | 34.9                  | y5       |
| QconCAT | YTELLNLVNEEILQLQEK | 1106.555            | 523.280           | 34.9                  | y4       |
| QconCAT | YTELLNLVNEEILQLQEK | 1106.555            | 855.432           | 34.9                  | b7       |
| MinE    | DILEVIC[+57]K      | 495.270             | 874.507           | 15.6                  | y7       |
| MinE    | DILEVIC[+57]K      | 495.270             | 761.423           | 15.6                  | y6       |
| MinE    | DILEVIC[+57]K      | 495.270             | 648.339           | 15.6                  | y5       |
| MinE    | DILEVIC[+57]K      | 495.270             | 471.245           | 15.6                  | b4       |
| MinE    | DILEVIC[+57]K      | 495.270             | 570.313           | 15.6                  | b5       |
| MinE    | DILEVIC[+57]K      | 495.270             | 683.397           | 15.6                  | b6       |
| QconCAT | DILEVIC[+57]K      | 499.757             | 882.483           | 15.6                  | y7       |
| QconCAT | DILEVIC[+57]K      | 499.757             | 768.402           | 15.6                  | y6       |
| QconCAT | DILEVIC[+57]K      | 499.757             | 654.321           | 15.6                  | y5       |
| QconCAT | DILEVIC[+57]K      | 499.757             | 475.233           | 15.6                  | b4       |
| QconCAT | DILEVIC[+57]K      | 499.757             | 575.299           | 15.6                  | b5       |
| QconCAT | DILEVIC[+57]K      | 499.757             | 689.380           | 15.6                  | b6       |
| FtsA    | GGVNDLESVVK        | 558.798             | 903.478           | 18.3                  | y8       |
| FtsA    | GGVNDLESVVK        | 558.798             | 789.435           | 18.3                  | y7       |
| FtsA    | GGVNDLESVVK        | 558.798             | 674.408           | 18.3                  | y6       |

**Table S2. Continued**

| <b>Protein</b>       | <b>Compound name</b> | <b>Precursor ion (m/z)</b> | <b>Product ion (m/z)</b> | <b>Collision energy (eV)</b> | <b>Ion name</b> |
|----------------------|----------------------|----------------------------|--------------------------|------------------------------|-----------------|
| FtsA                 | GGVNDLESVVK          | 558.798                    | 561.324                  | 18.3                         | y5              |
| FtsA                 | GGVNDLESVVK          | 558.798                    | 432.282                  | 18.3                         | y4              |
| FtsA                 | GGVNDLESVVK          | 558.798                    | 214.119                  | 18.3                         | b3              |
| QconCAT              | GGVNDLESVVK          | 565.279                    | 913.449                  | 18.3                         | y8              |
| QconCAT              | GGVNDLESVVK          | 565.279                    | 797.412                  | 18.3                         | y7              |
| QconCAT              | GGVNDLESVVK          | 565.279                    | 681.388                  | 18.3                         | y6              |
| QconCAT              | GGVNDLESVVK          | 565.279                    | 567.306                  | 18.3                         | y5              |
| QconCAT              | GGVNDLESVVK          | 565.279                    | 437.267                  | 18.3                         | y4              |
| QconCAT              | GGVNDLESVVK          | 565.279                    | 217.110                  | 18.3                         | b3              |
| MinD                 | IIVVTSGK             | 408.763                    | 703.435                  | 13.7                         | y7              |
| MinD                 | IIVVTSGK             | 408.763                    | 590.351                  | 13.7                         | y6              |
| MinD                 | IIVVTSGK             | 408.763                    | 491.282                  | 13.7                         | y5              |
| QconCAT              | IIVVTSGK             | 413.250                    | 711.411                  | 13.7                         | y7              |
| QconCAT              | IIVVTSGK             | 413.250                    | 597.330                  | 13.7                         | y6              |
| QconCAT              | IIVVTSGK             | 413.250                    | 497.265                  | 13.7                         | y5              |
| QconCAT              | IIVVTSGK             | 413.250                    | 429.300                  | 13.7                         | b4              |
| QconCAT              | IIVVTSGK             | 413.250                    | 531.345                  | 13.7                         | b5              |
| Ribosomal protein S4 | LSDYGVQLR            | 525.783                    | 850.442                  | 17.3                         | y7              |
| Ribosomal protein S4 | LSDYGVQLR            | 525.783                    | 735.415                  | 17.3                         | y6              |
| Ribosomal protein S4 | LSDYGVQLR            | 525.783                    | 572.351                  | 17.3                         | y5              |
| Ribosomal protein S4 | LSDYGVQLR            | 525.783                    | 635.304                  | 17.3                         | b6              |
| QconCAT              | LSDYGVQLR            | 532.263                    | 949.438                  | 17.3                         | y8              |
| QconCAT              | LSDYGVQLR            | 532.263                    | 861.409                  | 17.3                         | y7              |
| QconCAT              | LSDYGVQLR            | 532.263                    | 745.385                  | 17.3                         | y6              |
| QconCAT              | LSDYGVQLR            | 532.263                    | 581.325                  | 17.3                         | y5              |
| QconCAT              | LSDYGVQLR            | 532.263                    | 541.220                  | 17.3                         | b5              |
| QconCAT              | LSDYGVQLR            | 532.263                    | 641.286                  | 17.3                         | b6              |
| Ribosomal protein L6 | APVVVPAGVDVK         | 575.845                    | 883.525                  | 18.9                         | y9              |
| Ribosomal protein L6 | APVVVPAGVDVK         | 575.845                    | 784.456                  | 18.9                         | y8              |
| Ribosomal protein L6 | APVVVPAGVDVK         | 575.845                    | 685.388                  | 18.9                         | y7              |
| Ribosomal protein L6 | APVVVPAGVDVK         | 575.845                    | 268.166                  | 18.9                         | b3              |
| Ribosomal protein L6 | APVVVPAGVDVK         | 575.845                    | 367.234                  | 18.9                         | b4              |
| Ribosomal protein L6 | APVVVPAGVDVK         | 575.845                    | 466.302                  | 18.9                         | b5              |
| QconCAT              | APVVVPAGVDVK         | 582.326                    | 893.495                  | 18.9                         | y9              |
| QconCAT              | APVVVPAGVDVK         | 582.326                    | 793.430                  | 18.9                         | y8              |
| QconCAT              | APVVVPAGVDVK         | 582.326                    | 693.364                  | 18.9                         | y7              |
| QconCAT              | APVVVPAGVDVK         | 582.326                    | 271.157                  | 18.9                         | b3              |
| QconCAT              | APVVVPAGVDVK         | 582.326                    | 371.222                  | 18.9                         | b4              |
| QconCAT              | APVVVPAGVDVK         | 582.326                    | 471.288                  | 18.9                         | b5              |
